## Parametrization of Worldwide Covid-19 data for multiple variants: How is the SAR-Cov2 virus evolving?

Dietrich Foerster<sup>1</sup>, Sayali Bhatkar<sup>2</sup>, Gyan Bhanot<sup>3\*</sup>

<sup>1</sup> Laboratoire Ondes et Matière d'Aquitaine, University of Bordeaux, 351 Cours de la Libération, 33400 Talence, France

<sup>2</sup> Faculty of Science and Engineering, Intelligent Systems - Bernoulli Institute, University of Groningen, Nijenborgh 9747 AG Groningen, The Netherlands

<sup>3</sup> Department of Molecular Biology and Biochemistry and Department of Physics and Astronomy, Rutgers University, 136 Frelinghuysen Road, Piscataway, NJ 08544, USA

\* Corresponding Author: [gyanbhanot@gmail.com](mailto:gyanbhanot@gmail.com)

We mapped the 2020-2023 daily Covid-19 case data from the World Health Organization (WHO) to the original SIR model of Karmack and McKendrick for multiple pandemic recurrences due to the evolution of the virus to different variants in forty countries worldwide. The aim of the study was to determine how the SIR parameters are changing as the virus evolved into variants. Each peak in cases was analyzed separately for each country and the parameters:  $r_{\text{eff}}$  (pandemic R-parameter),  $L_{\text{eff}}$  (average number of days an individual is infective) and  $\alpha$  (the rate of infection for contacts between the set of susceptible persons and the set of infected persons) were computed. Each peak was mapped to circulating variants for each country and the SIR parameters ( $r_{\text{eff}}$ ,  $L_{\text{eff}}$ ,  $\alpha$ ) were averaged over each variant using their values in peaks where 70% of the variant sequences identified belonged to a single variant. This analysis showed that on average, compared to the original Wuhan variant ( $\alpha = 0.2$ ), the parameter  $\alpha$  has increased to  $\alpha = 0.5$  for the Omicron variants. The value of  $r_{\text{eff}}$  has decreased from around 3.8 to 2.0 and  $L_{\text{eff}}$  has decreased from 15 days to 10 days. This is as would be expected of a virus that is coming to equilibrium by evolving to increase its infectivity while reducing the effects of infections on the host.

**Keywords** : SIR model, WHO epidemic SARS-Cov-2/Covid-19 reported daily cases data, Worldwide changes in SIR model parameters for variants of Covid-19.

### Introduction and Method

Extensive data on the spread of the SARS-Cov-2/Covid-19 epidemic from 2020 to the present for most countries are available from the World Health Organization (WHO) [1]. Here we consider three years of data, from 3/1/2020 to 28/2/2023, for a subset of countries where the peaks in daily identified infections from various variants separate into well-defined peaks. Various mathematical models of epidemics have been described in the literature, with the SIR model, published nearly a century ago [2], being the earliest and simplest of such models (see [3,4] for reviews).

Before one can determine whether a mathematical model describes the available WHO data, one encounters the difficulty that the WHO data describes only reported (symptomatic and/or tested) infections, while the true number of infections remains unknown. Extended SIR models have been proposed to resolve this difficulty [5,6,7,8,9]. In this study, we parametrize the ratio of reported infections to the total number of infections as a constant for a given peak but variable for peaks from different variants of the virus within each country. We also assume that waves of infections from variants can be treated as independent, with an SIR model describing each of them separately. With these two simple hypotheses, we show that the SIR model provides a qualitatively correct parametrization of most of the world's SARS-Cov-2/Covid-19 data.

In the SIR model of epidemic infections [2], the number of infected  $I(t)$  and susceptible  $S(t)$  individuals in a population of  $N$  interacting individuals evolves as a function of time  $t$  (measured in days) according to the following coupled ordinary differential equations:

$$\begin{aligned} \frac{dS}{dt} &= -\frac{\alpha}{N} S(t)I(t) \\ \frac{dI}{dt} &= \frac{\alpha}{N} S(t)I(t) - I(t)/L_{\text{eff}} \end{aligned} \quad (1)$$

Here  $\alpha$  is the rate of infection between an infected person in the  $I$  compartment and a susceptible person in the  $S$  compartment, and  $L_{\text{eff}}$  is the time an infected person remains infective. For each peak, we impose the initial conditions  $I(-\infty) = 0, S(-\infty) = N$ . We also assume that  $S(t), I(t)$  evolve sufficiently slowly for the derivatives  $\frac{dS}{dt}, \frac{dI}{dt}$  to be meaningful. The number of parameters reduces to a single variable  $r_{\text{eff}}$  when these equations are rewritten in terms of the rescaled variables  $s = S/N, i = I/N$  and  $\tau = t/L_{\text{eff}}$ :

$$\begin{aligned} \frac{ds}{d\tau} &= -r_{\text{eff}}s(\tau)i(\tau) \\ \frac{di}{d\tau} &= r_{\text{eff}}s(\tau)i(\tau) - i(\tau) \\ r_{\text{eff}} &= \alpha L_{\text{eff}} \end{aligned} \quad (2)$$

The initial conditions are now:  $i(-\infty) = 0, s(-\infty) = 1$ . From Eq. 2, it is easy to show that the number of infections  $i(\tau)$  increases as  $\exp(r_{\text{eff}} - 1)\tau$  for small  $\tau$ , reaches a maximum at  $s = \frac{1}{r_{\text{eff}}}$  and decays as  $\exp(-(1 - r_{\text{eff}}s(\infty))\tau)$  for large  $\tau$ .

### **Reported symptomatic infections versus the total number of infections.**

As noted above, the WHO Covid-19 data reports only identified (symptomatic and/or tested) infections, whereas the SIR model in the form represented above describes all infections. To circumvent this difficulty, we assume that the infections reported by the WHO data represent, for a given peak and country, a fixed ratio of all infections. In other words, we represent the observed data  $i_{\text{observed}}(t)$  in terms of model data  $i_{\text{model}}(t, r_{\text{eff}}, L_{\text{eff}})$  only up to a fixed multiplicative factor. Thus, we assume that the logarithms of the observed and model data differ by a constant  $c$ :

$$\log i_{\text{model}}(t, r_{\text{eff}}, L_{\text{eff}}) + c \simeq \log i_{\text{observed}}(t) \quad (3)$$

We will consider those parameters  $r_{\text{eff}}$ ,  $L_{\text{eff}}$  as "optimal" which minimize the average quadratic difference in the logarithms. Thus, we define the error:

$$\text{error} = \langle [\log i_{\text{model}}(t, r_{\text{eff}}, L_{\text{eff}}) + c - \log i_{\text{observed}}(t)]^2 \rangle \quad (4)$$

where  $\langle \rangle$  indicates an average over the days of the epidemic wave under consideration. Since  $c$  is a function of  $r_{\text{eff}}$  and  $L_{\text{eff}}$ , we minimize the error (Eq. 4) with respect to these two parameters.

### **Decomposition of a country's Covid-19 data into distinct peaks.**

The Covid-19 epidemic occurred in successive waves that are recognized as being due to distinct variants of the original virus (<https://ourworldindata.org/grapher/covid-variants-area>). An important source of noise comes from the data being collected and combined from different locations in different ways and reported at different times (days of the week) in different countries. Consequently, to identify the parameters for the various peaks, we had to first smooth the WHO data for  $I(t)$  by locally averaging them over a few days. We then used the maxima and minima for the smoothed data to decompose them into distinct peaks. Figure 1 shows the results of this smoothing procedure applied to the Covid-19 data of South Korea and Japan.

### **Measuring the parameters.**

We determined the optimal parameters  $\gamma_{\text{eff}} = 1/L_{\text{eff}}$ ,  $r_{\text{eff}}$  for each peak in the original raw data, using the maxima of the smoothed data as centers ( $t = 0$ ) of the data. We do this by minimizing the quadratic error (Eq. 4) using the Powell minimization algorithm [10,11]. The results of this procedure for a number of countries are shown in Figure 2a,b,c. The complete results for all forty countries analyzed are in Supplementary Figures.

To estimate the accuracy of our results, we added normally distributed noise to the averaged logarithm of the data:

$$\text{modified\_log } i(t) = \log i_{\text{observed}}(t) + \text{noise}(t, \sigma) \quad (5)$$

with  $\sigma$  taken as the mean deviation between the logarithm of the smoothed data and the logarithm of the raw data. The resulting dispersion of the parameters  $\gamma_{\text{eff}}$ ,  $r_{\text{eff}}$  provides an estimate of their accuracy. Because we optimized the parameters for the individual peaks, the transitions from one (computed) peak to the next were abrupt and show cusps or jumps in the derivative, while the observed WHO data are smooth because they do not distinguish between different virus variants.

## Details of Method used to solve the SIR equations.

There are different ways to solve these equations. Our own procedure uses the known values of  $S, I$  at the peak as an anchoring point. In the equations we rescale variables as  $s(t) = S(t)/r_{\text{eff}}$  and  $i(t) = I(t)/r_{\text{eff}}$  to obtain

$$\frac{di}{dt} = S(t) * I(t) - I(t), \frac{ds}{dt} = -S(t) * I(t)$$

Now the dependence on  $r_{\text{eff}}$  is only via the initial condition  $S(-\infty) = r_{\text{eff}}$ . Using the above equations, it is now easy to find a quantity that remains unchanged under evolution in  $\tau$

$$\frac{dI}{dS} = \frac{\frac{dI}{dt}}{\frac{dS}{dt}} = \frac{1}{S} - 1$$

$$\frac{d}{dS} (I(S) + S - \log(S)) = 0$$

This implies that  $I(S) + S - \log(S)$  remains unchanged under evolution in  $\tau$ . Because  $\frac{dI}{dt}$  changes sign at  $S = 1$  its maximum  $I_{\text{max}}$  must be at  $S = 1$  and we obtain the well-known result:

$$I(S) + S - \log(S) = I_{\text{max}} + 1$$

By specializing the last equation to  $t \rightarrow -\infty$  and using  $S(-\infty) = r_{\text{eff}}$  we find the actual value of  $I_{\text{max}}$

$$I_{\text{max}} = r_{\text{eff}} - \log(r_{\text{eff}}) - 1$$

Using the point  $(S, I) = (1, I_{\text{max}})$  as a reference point, it is then easy to integrate the SIR equations in the positive and the negative  $\tau$  directions using 4th order Runge-Kutta integration. Using a time step  $d\tau = 0.01$  we obtained results with an accuracy of better than  $10^{-10}$  for the parameters and time ranges we used.

## Data used in the study:

The subset of data for daily identified cases used in this study was obtained from WHO (<https://covid19.who.int/WHO-COVID-19-global-data.csv>) and is in Supplementary Table 1 and the data on variants identified for these countries as a function of time is in Supplementary Table 2 (from <https://ourworldindata.org/grapher/covid-variants-area>).

## Results

The SIR parameters  $r_{\text{eff}}$ ,  $L_{\text{eff}}$  and  $\alpha$  from our analysis for forty countries are given in Supplementary Table 3. Supplementary Table 3 also shows the mapping of peaks in each country

to one or more circulating variants at or near the peak, using data from Supplementary Table 2. SIR parameter values are given only for those peaks whose variants could be mapped.

Several peaks represented multiple variants, with varying fractions of measured variants (See Table 3). Peaks where a single dominant variant was circulating in over 70% of sequences from confirmed cases were identified from Supplementary Table 3 and are shown in Supplementary Table 4. We only retained those variants whose identity was confirmed in the data in Supplementary Table 2. For example, for India, the first peak was labeled as “non-who” so this data was not included in Supplementary Table 4. We identified peaks in all forty countries that had a single dominant variant whose measured fraction in Supplementary Table 2,3 was over 70%. The values of the parameters ( $r_{\text{eff}}$ ,  $L_{\text{eff}}$ ,  $\alpha$ ) were averaged for this variant over all countries for those peaks. This was done separately for each variant. Figures 3,4,5 show how these parameters changed on average from the original Wuhan variant to the variants that appeared chronologically worldwide: namely, Alpha, Beta, Gamma, Delta, and Omicron variants BA1, BA2, BA5 and BQ1. The variant Omicron BA4, which appeared almost at the same time as Omicron BA5 was subdominant in all peaks and countries we analyzed.

### **Summary and Discussion:**

Several methods have been proposed to analyze multiple waves of pandemics from variants or strains. These methods try to identify mechanisms and their effects on various aspects of the pandemic. For example, in [12], the authors study five different mechanisms associated with multiple influenza epidemics. In contrast, [13] studies the effect of multi strain transmissions.

In this paper, we study the worldwide evolution of the Covid-19 pandemic as it developed into new variants. Our goal is to study the pandemic parameters as the virus evolved. To do this, we used worldwide WHO daily case data for Covid-19 (Supplementary Table 1) and analyzed it using the Kermack and McKendrick SIR model [2]. Each peak in cases was treated independently and the data mapped to the SIR Model yielded estimates of the SIR parameters  $r_{\text{eff}}$ ,  $L_{\text{eff}}$  and  $\alpha$ . Some of the cut-points and fits to the data are shown in Figures 1 and 2 respectively. From the data on circulating variants measured worldwide (Supplementary Table 2), we chose forty countries which had the highest number of days with measurements of circulating variants. For these countries, the peaks were mapped to the data for circulating variants to identify the fraction of each variant type represented in the peak (Supplementary Table 3). For each variant, we identified peaks across all countries where a single dominant variant represented over 70% of cases (Supplementary Table 4). The SIR parameters for each such variant across all peaks and countries were averaged and are shown in Figures 3-5. The x axis in these figures approximately represents time because the variants listed are plotted in the order of their worldwide appearance.

Figures 3,4,5 show that on average, compared to the original Wuhan variant ( $\alpha = 0.2$ ), the parameter  $\alpha$  dramatically increased in the Alpha and Beta variants but has since decreased to an asymptotic value close to  $\alpha = 0.5$  for the Omicron variants. The values of  $r_{\text{eff}}$  and  $L_{\text{eff}}$  have decreased from around 3.8 and 15 days respectively for the Wuhan variant to 2.0 and 10 days for the Omicron variants. This suggests that the SARS-Cov-2 virus is evolving to increase its infectivity (increase  $\alpha$ ) while reducing the values of  $r_{\text{eff}}$  and  $L_{\text{eff}}$ .

Similar methods could be applied to other viral pandemics of the past and future.

**Author Contributions:** All authors contributed equally to the development of the model and the analysis of the data. GB and DF wrote the paper. All authors have read and approved the manuscript, figures and supplementary materials.

**Acknowledgements:** The authors thank world data collection agencies for providing public access to good data for our analysis.

#### FIGURE CAPTIONS:

**Figure 1:** The figure shows the location of maxima and minima for two countries, South Korea and Japan. The minima locate the boundaries in time between which fits to the SIR model were made for each peak as described in the text.

**Figure 2a-e:** Shows the WHO data and the SIR model fits for ten countries, chosen from six continents.

**Figure 3-5:** Show the worldwide variation of the SIR parameters  $\alpha$ ,  $r_{\text{eff}}$  and  $L_{\text{eff}}$  as a function of the Covid variant. For each variant, we averaged the SIR model parameters for peaks in daily cases where the variant represented more than 70% of the measured circulating virus. The x-axis approximately labels time as the variants are arranged in order of their appearance worldwide.

#### SUPPLEMENTARY FIGURE CAPTIONS:

**Supplementary Figures:** Shows the WHO data and fits to the SIR model for all forty countries.

#### SUPPLEMENTARY TABLE CAPTIONS:

**Supplementary Table 1:** WHO data used in this study. The data was obtained from: <https://covid19.who.int/WHO-COVID-19-global-data.csv>.

**Supplementary Table 2:** Worldwide data on variants identified as a function of time. The data was obtained from <https://ourworldindata.org/grapher/covid-variants-area>.

**Supplementary Table 3:** SIR parameters from fits using methods described in the paper for all countries where each peak could be mapped to a circulating Covid variant using data from Supplementary Table 2.

**Supplementary Table 4:** SIR parameters for peaks where the measured circulating variant had at least 70% of a single variant.

## REFERENCES:

- 1 <https://covid19.who.int/WHO-COVID-19-global-data.csv>
- 2 W.O. Kermack and A.G. McKendrick, "A contribution to the mathematical theory of epidemics", *Proceedings of the Royal Society of London A: Mathematical, Physical and Engineering Sciences*, **115**(1927) 700.
- 3 F. Brauer, "Mathematical epidemiology: Past, present, and future", *Infectious Disease Modelling* **2** (2017), 113.
- 4 H.Weiss, "The SIR model and the Foundations of Public Health", *Material Mathematics* **3**(2013) 17, <http://www.mat.uab.cat/matmat>.
- 5 Z. Liu, P. Magal and G. Webb, "Predicting the number of reported and unreported cases for the COVID- 19 epidemics in China, South Korea, Italy, France, Germany and United Kingdom", *Journal of Theoretical Biology* **509** (2021) 110501.
- 6 Q. Griette, J. Demongeot and P. Magal, "A Robust Phenomenological Approach to Investigate Covid-19 data for France", *Mathematics in Applied Sciences and Engineering*, Volume **2** (2021)149.
- 7 I. Cooper, A. Mondal, C.G. Antonopoulos, and A. Mishra, "Dynamical analysis of the infection status in diverse communities due to COVID-19 using a modified SIR model", *Nonlinear Dynamics* **109** (2022) 19; <https://doi.org/10.1007/s11071-022-07347-0>:
- 8 I. Cooper, A. Mondal, C.G. Antonopoulos, "A SIR model assumption for the spread of COVID-19 in different communities", *Chaos, Solitons and Fractals* **139** (2020) 110057
- 9 S. Bhatkar, M. Ma, M. Zsolway, A. Tarafder, S. Doniach, G. Bhanot. "Asymmetry in the peak in Covid-19 daily cases and the pandemic R-parameter", [<https://medrxiv.org/cgi/content/short/2023.07.23.23292960v1>]
10. M.J.D. Powell, "An efficient method for finding the minimum of a function of several variables without calculating derivatives", *The Computer Journal* **7**, 2 9164, 155; <https://doi.org/10.1093/compjnl/7.2.155>; M.J.D. Powell, "A view of Algorithms for Optimization without Derivatives", [http://www.damtp.cam.ac.uk/user/na/NA\\_papers/NA2007\\_03.pdf](http://www.damtp.cam.ac.uk/user/na/NA_papers/NA2007_03.pdf)

11. See also <https://github.com/libprima/> for Powell's minimization routines in several computing languages.

12 A. Mummert, H. Weiss, L.-P. Long, J.M. Amigó and X-F. Wan (2013), "A Perspective on Multiple Waves of Influenza Pandemics", PLoS ONE **8** (2013) e60343, doi:10.1371/journal.pone.0060343

13 T. Lazebnik, S. Bunimovich-Mendrazitsky, "Generic approach for mathematical model of multi-strain pandemics" PLoS ONE **17** (2022) 4, <https://doi.org/10.1371/journal.pone.0260683>



# FIGURE 1

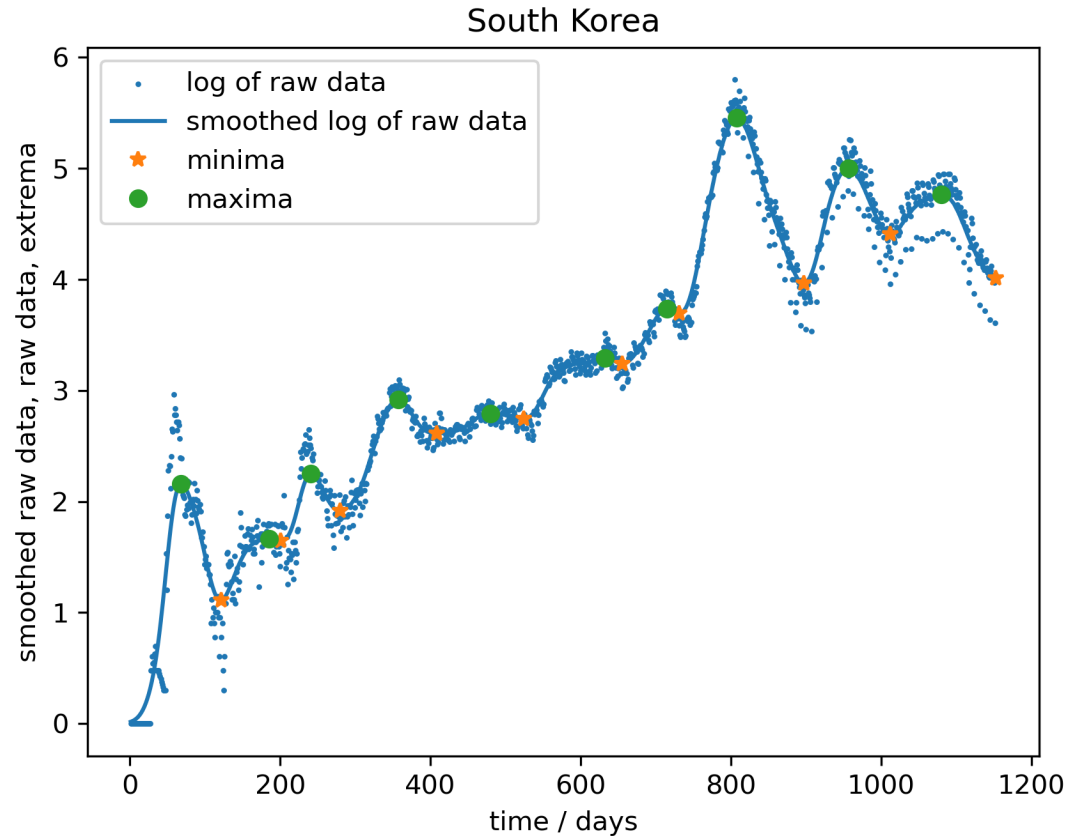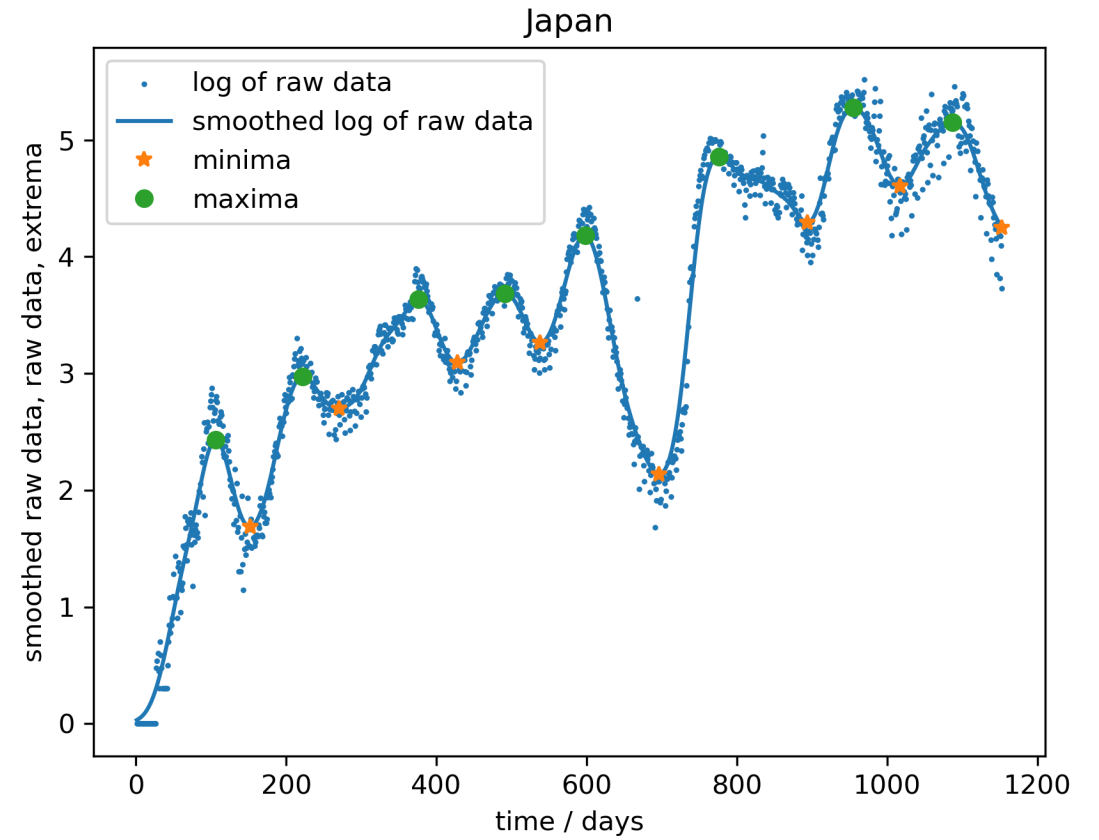

# FIGURE 2a

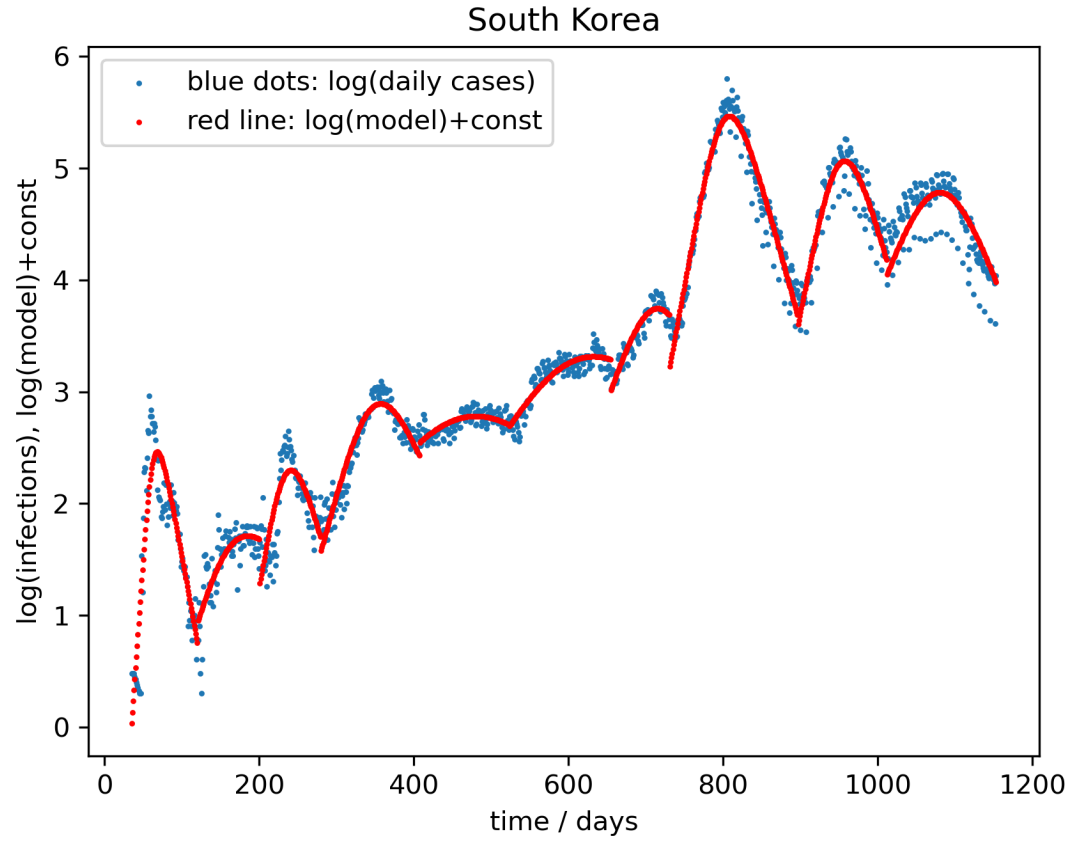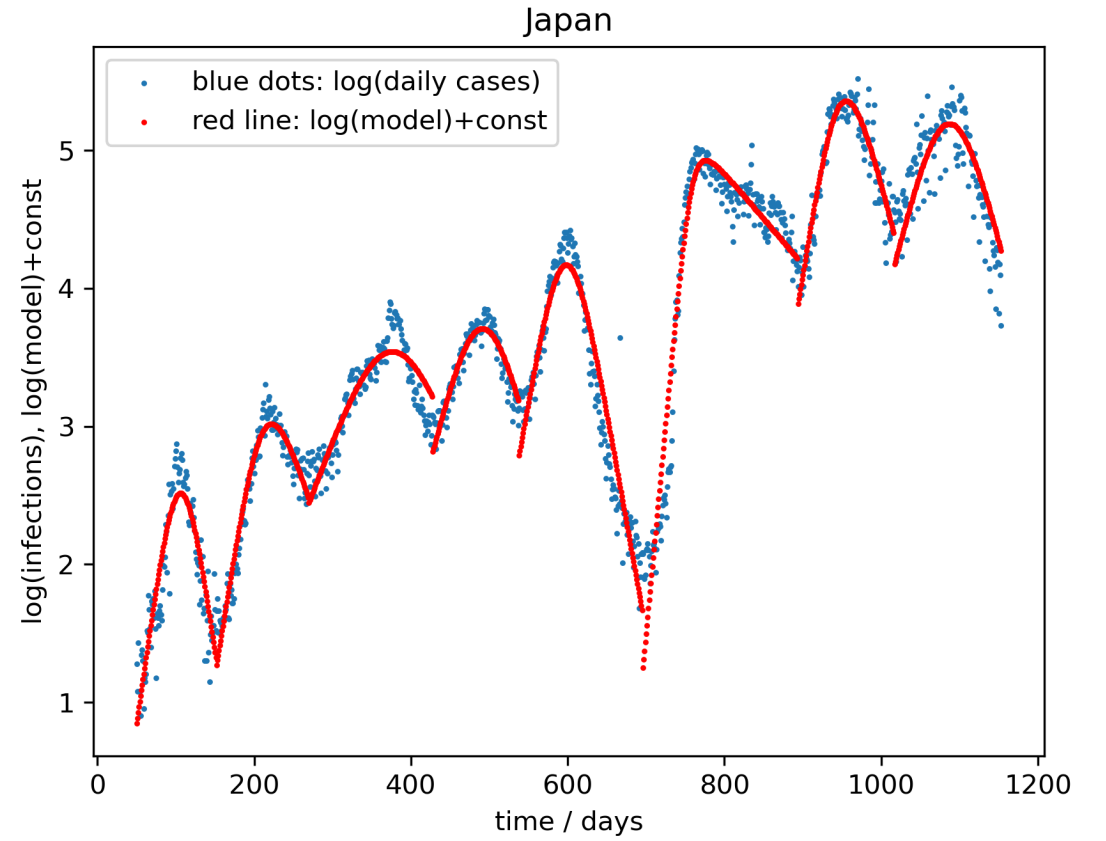

# FIGURE 2b

## Germany

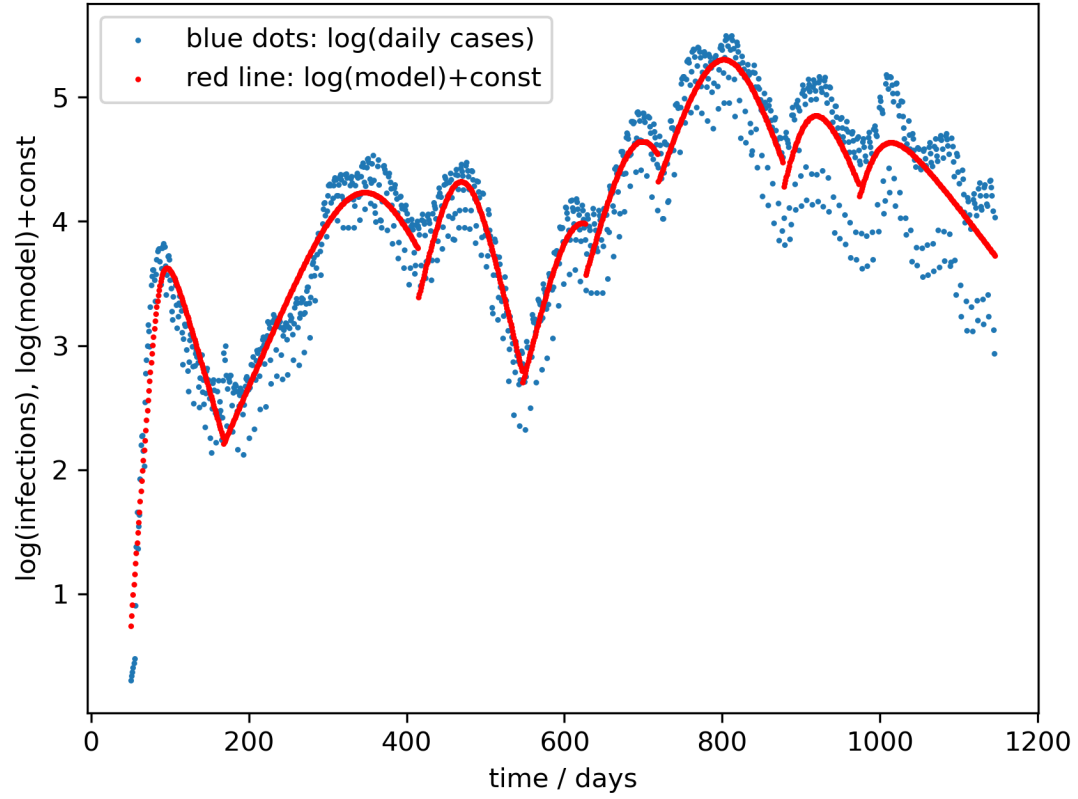

## France

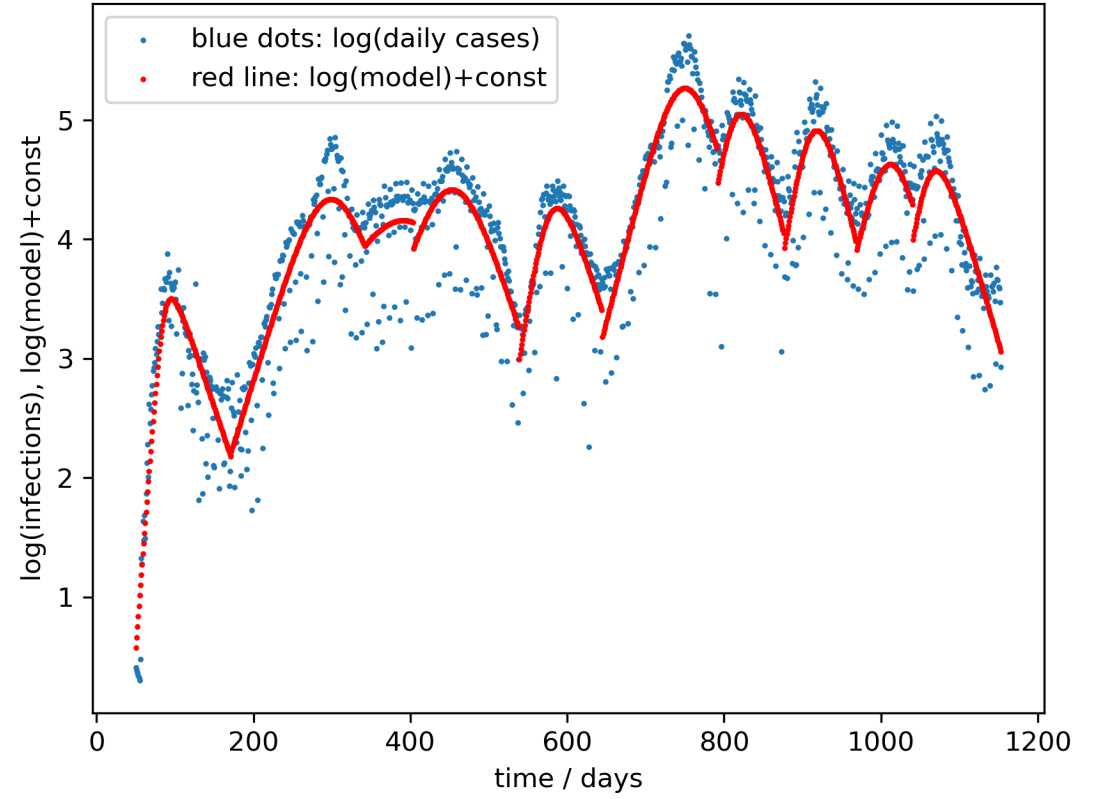

# FIGURE 2c

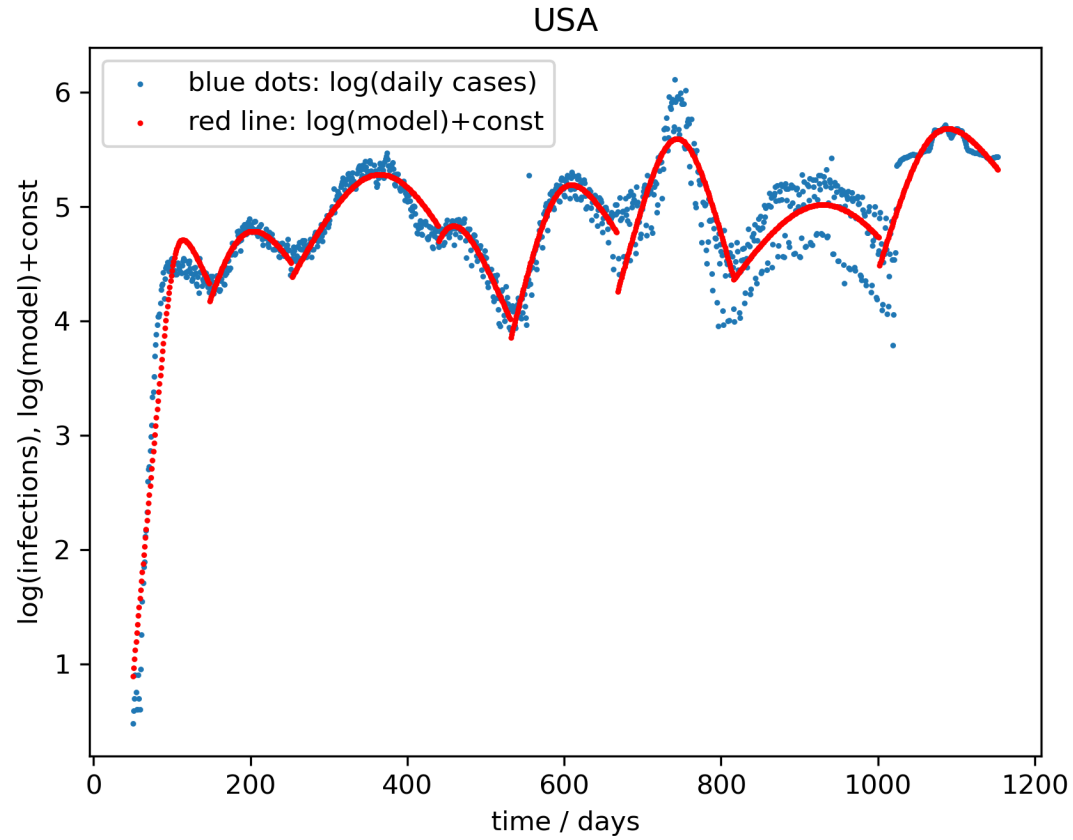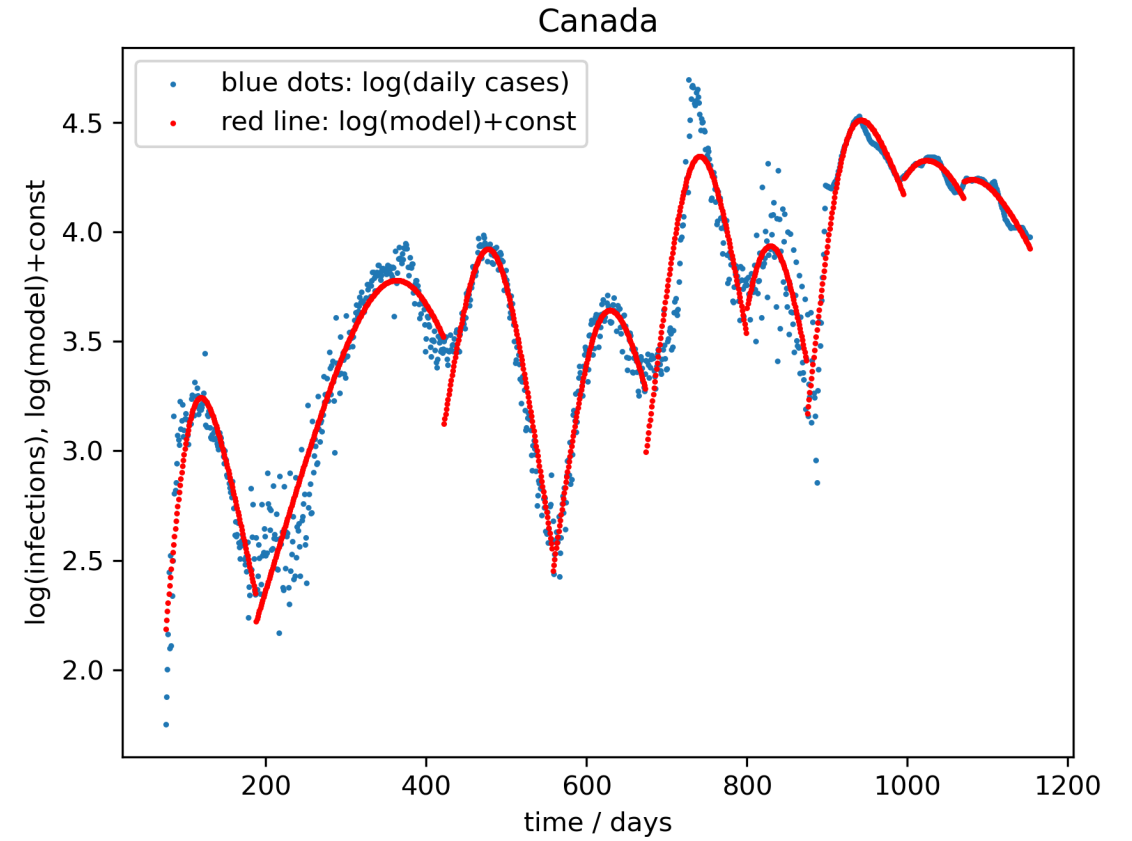

# FIGURE 2d

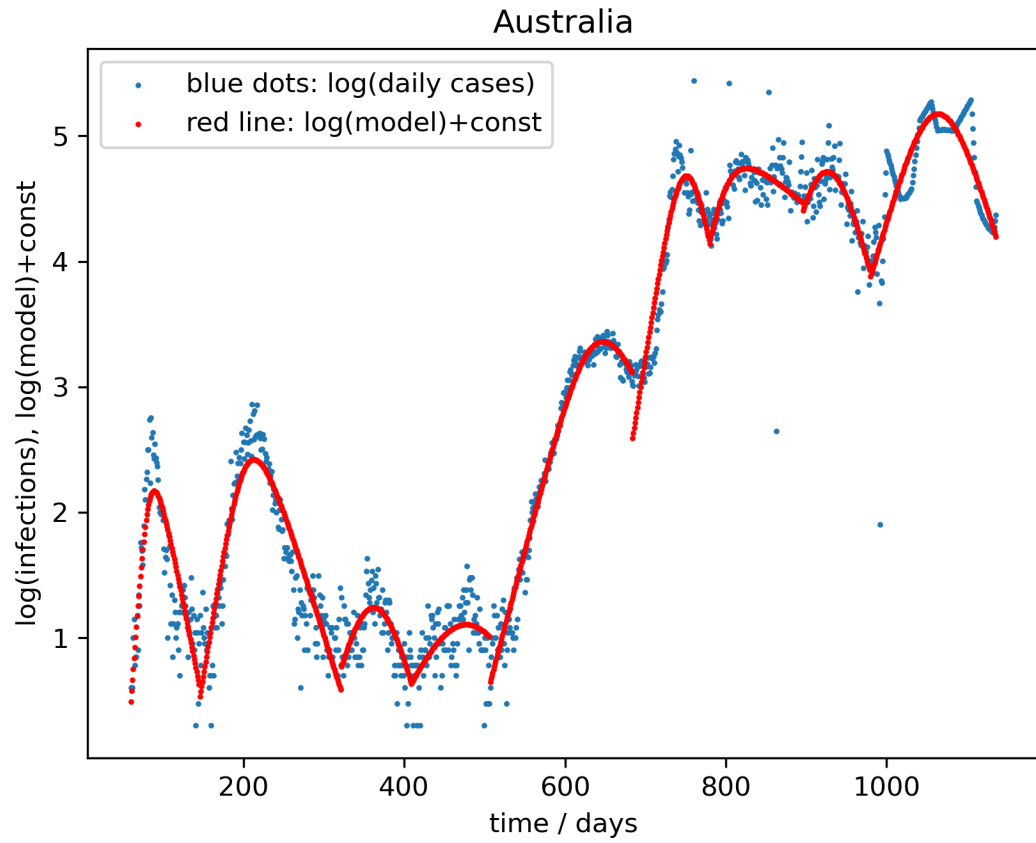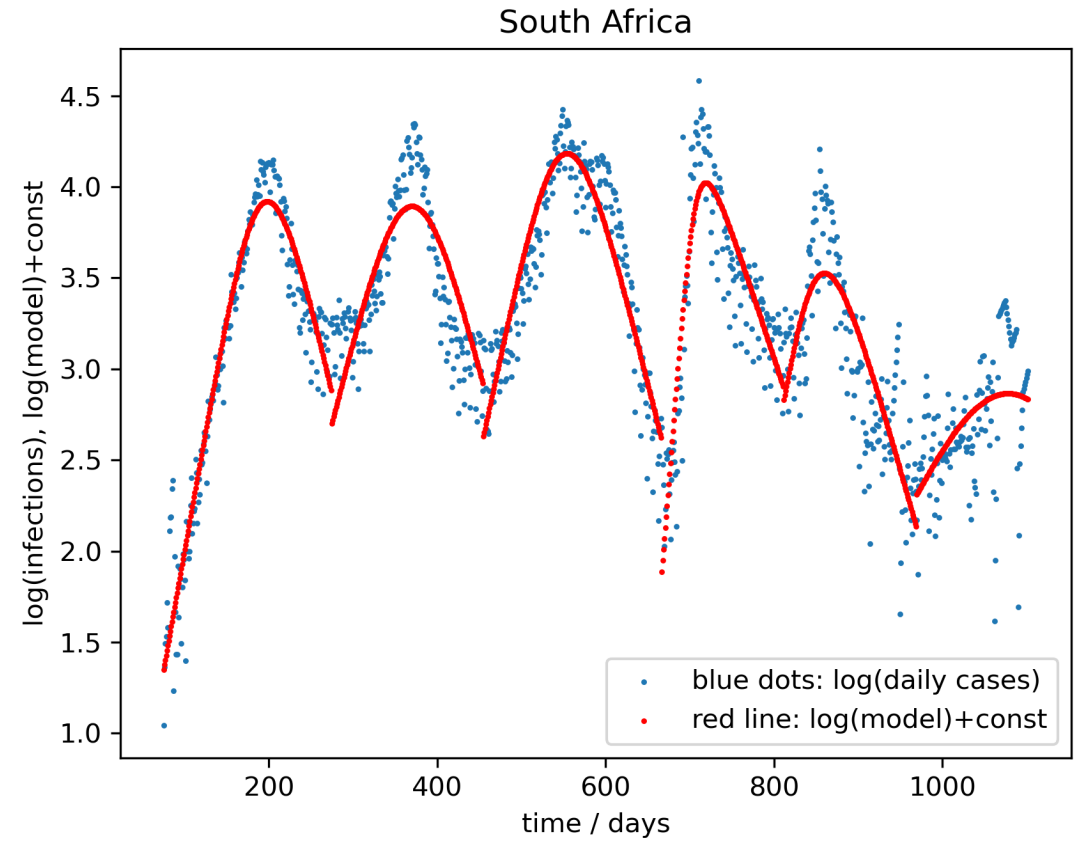

# FIGURE 2e

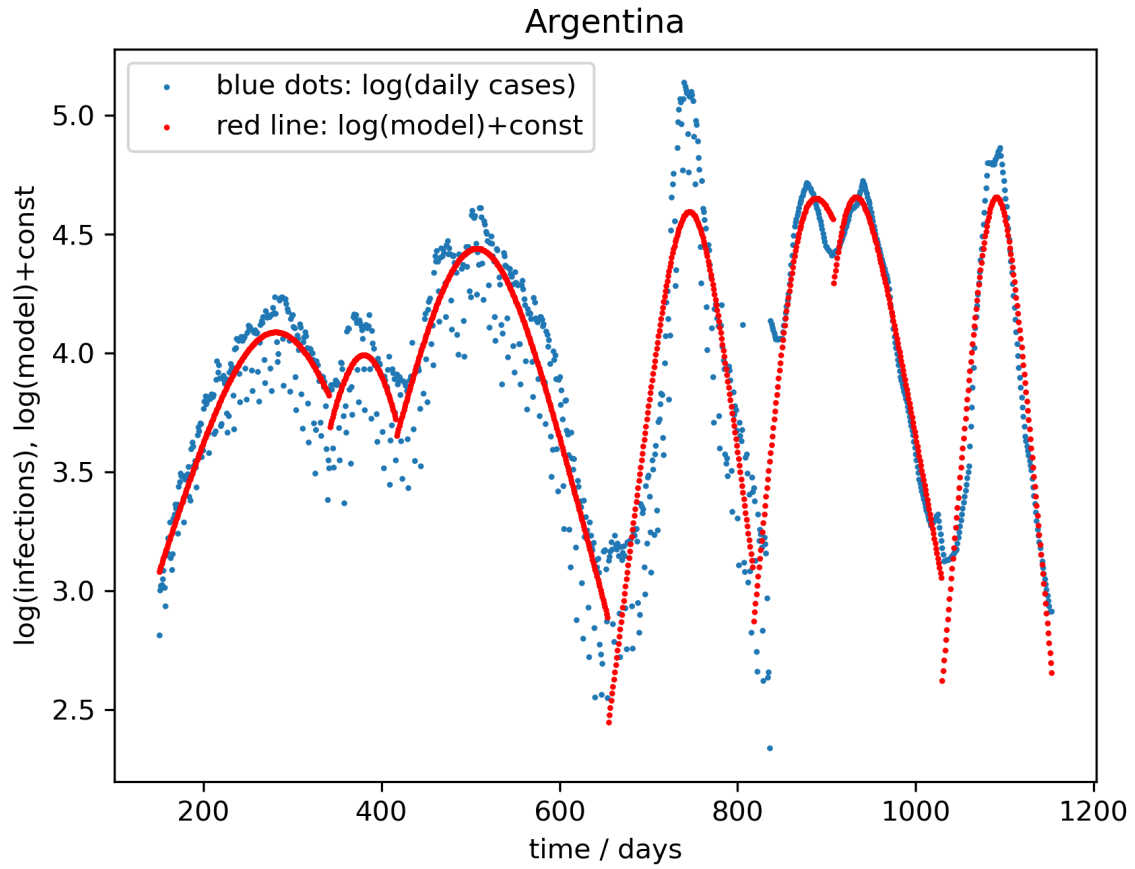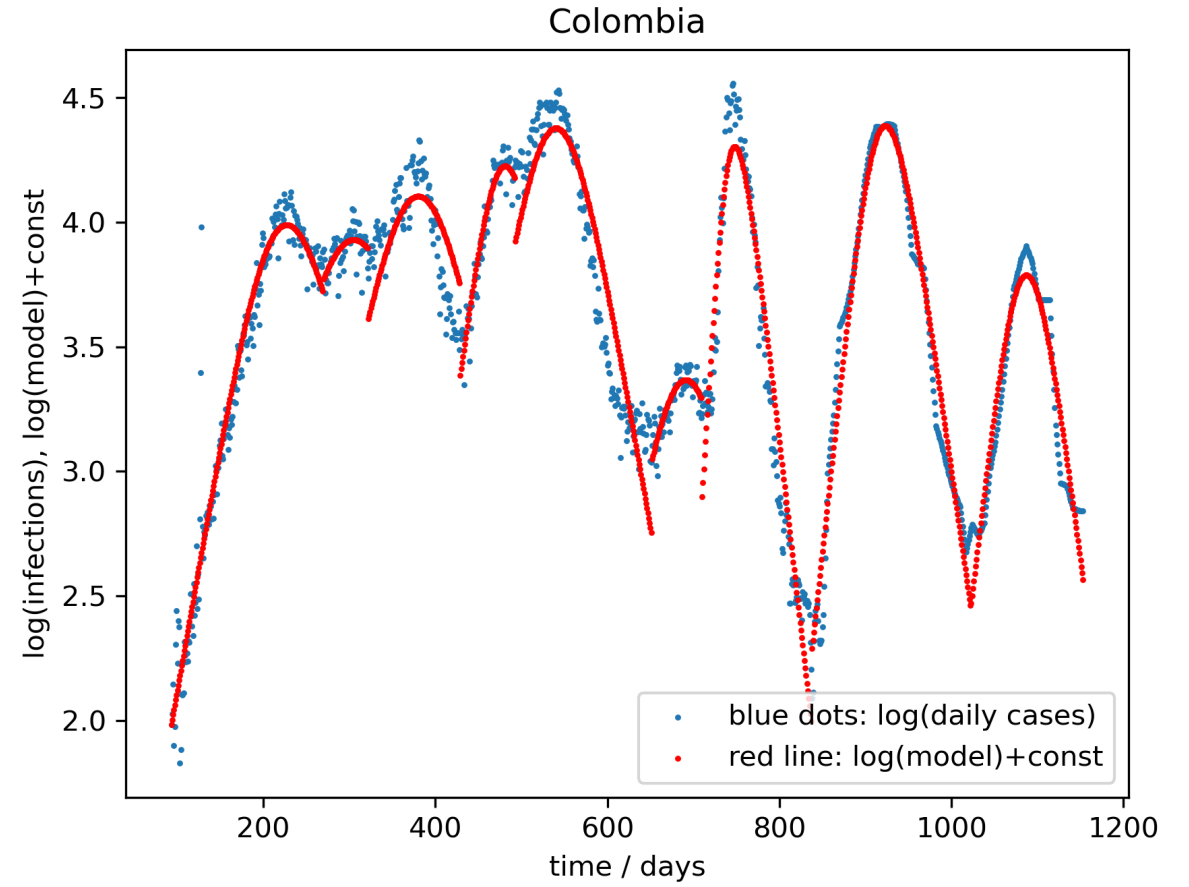

FIGURE 3

### More than 70 % variant in peaks

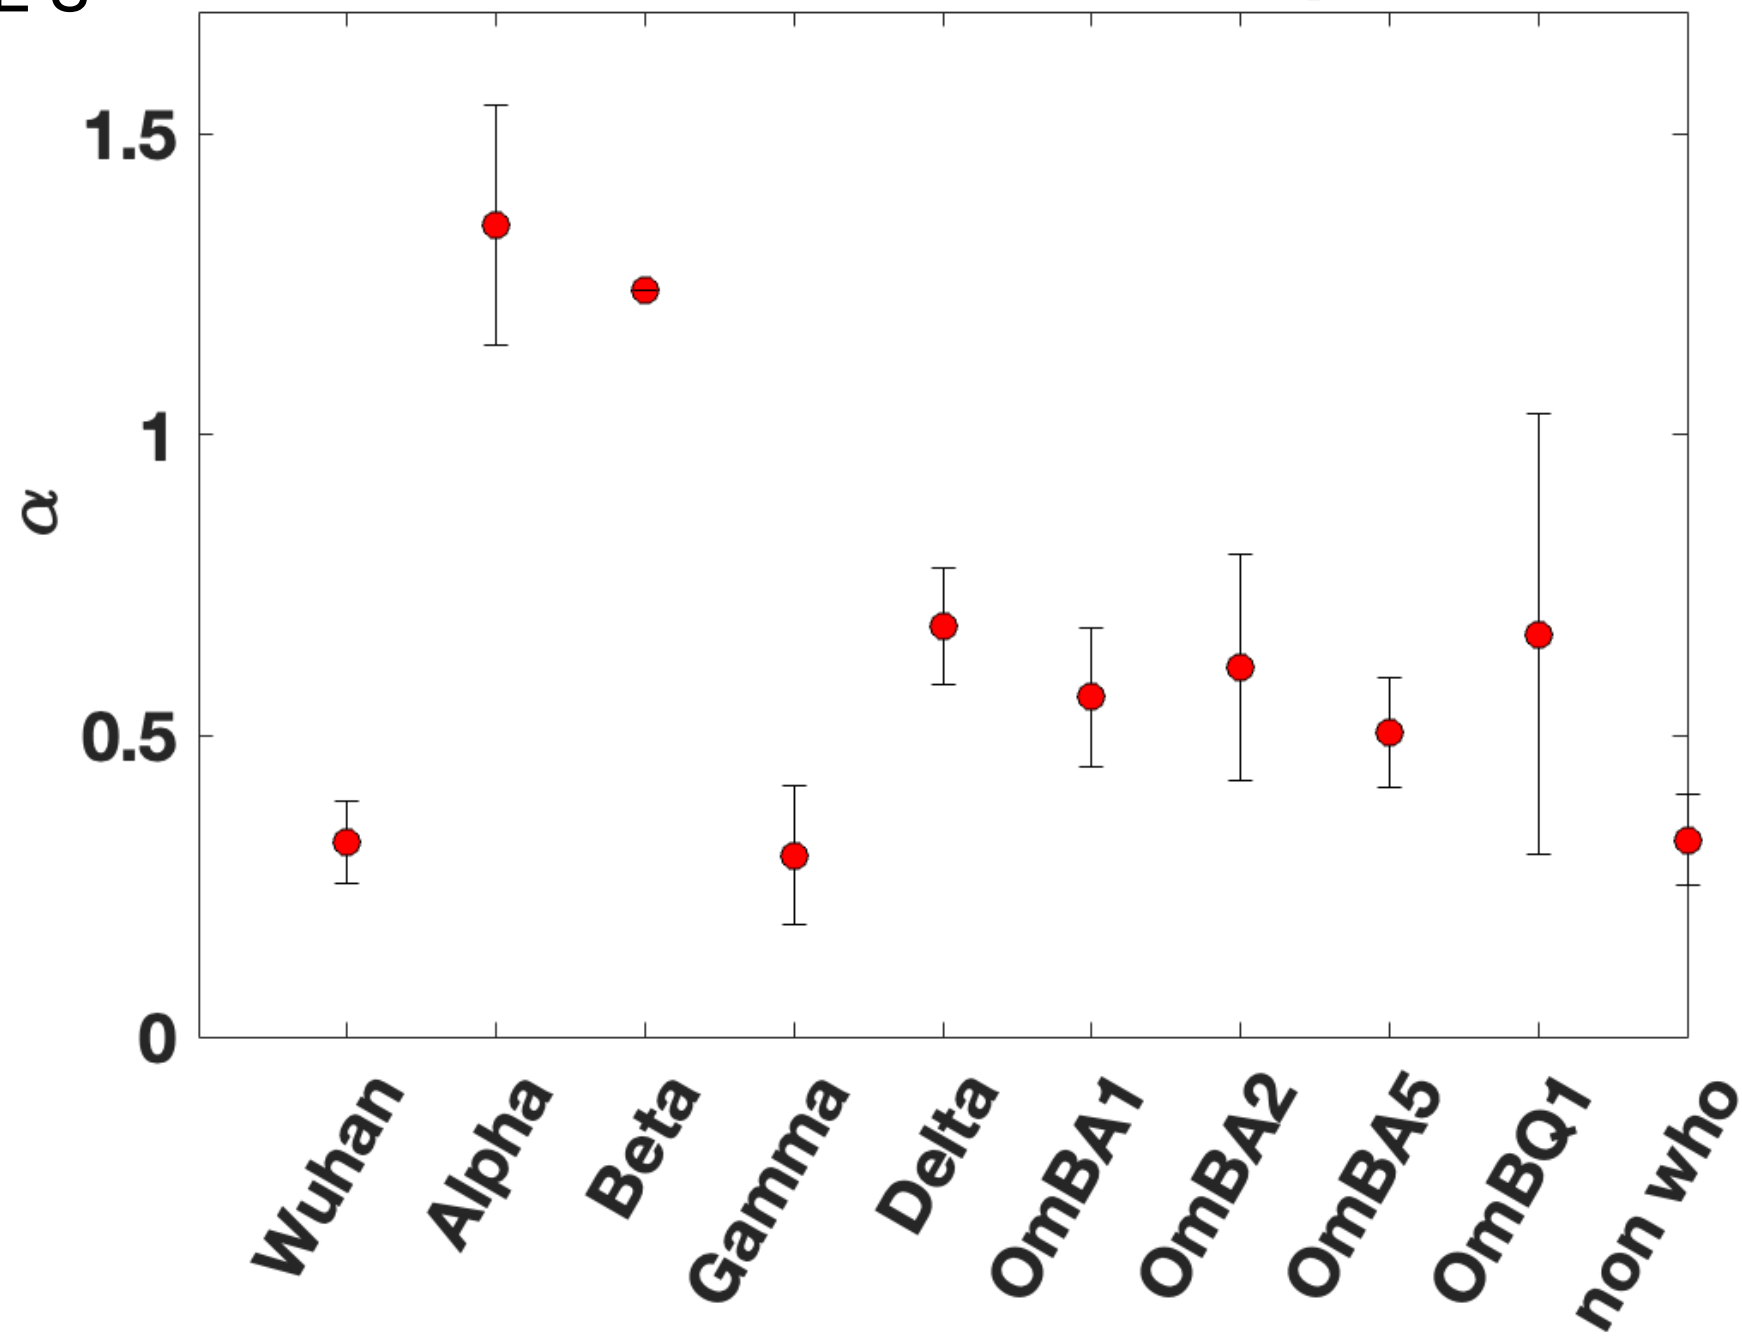

FIGURE 4

### More than 70 % variant in peaks

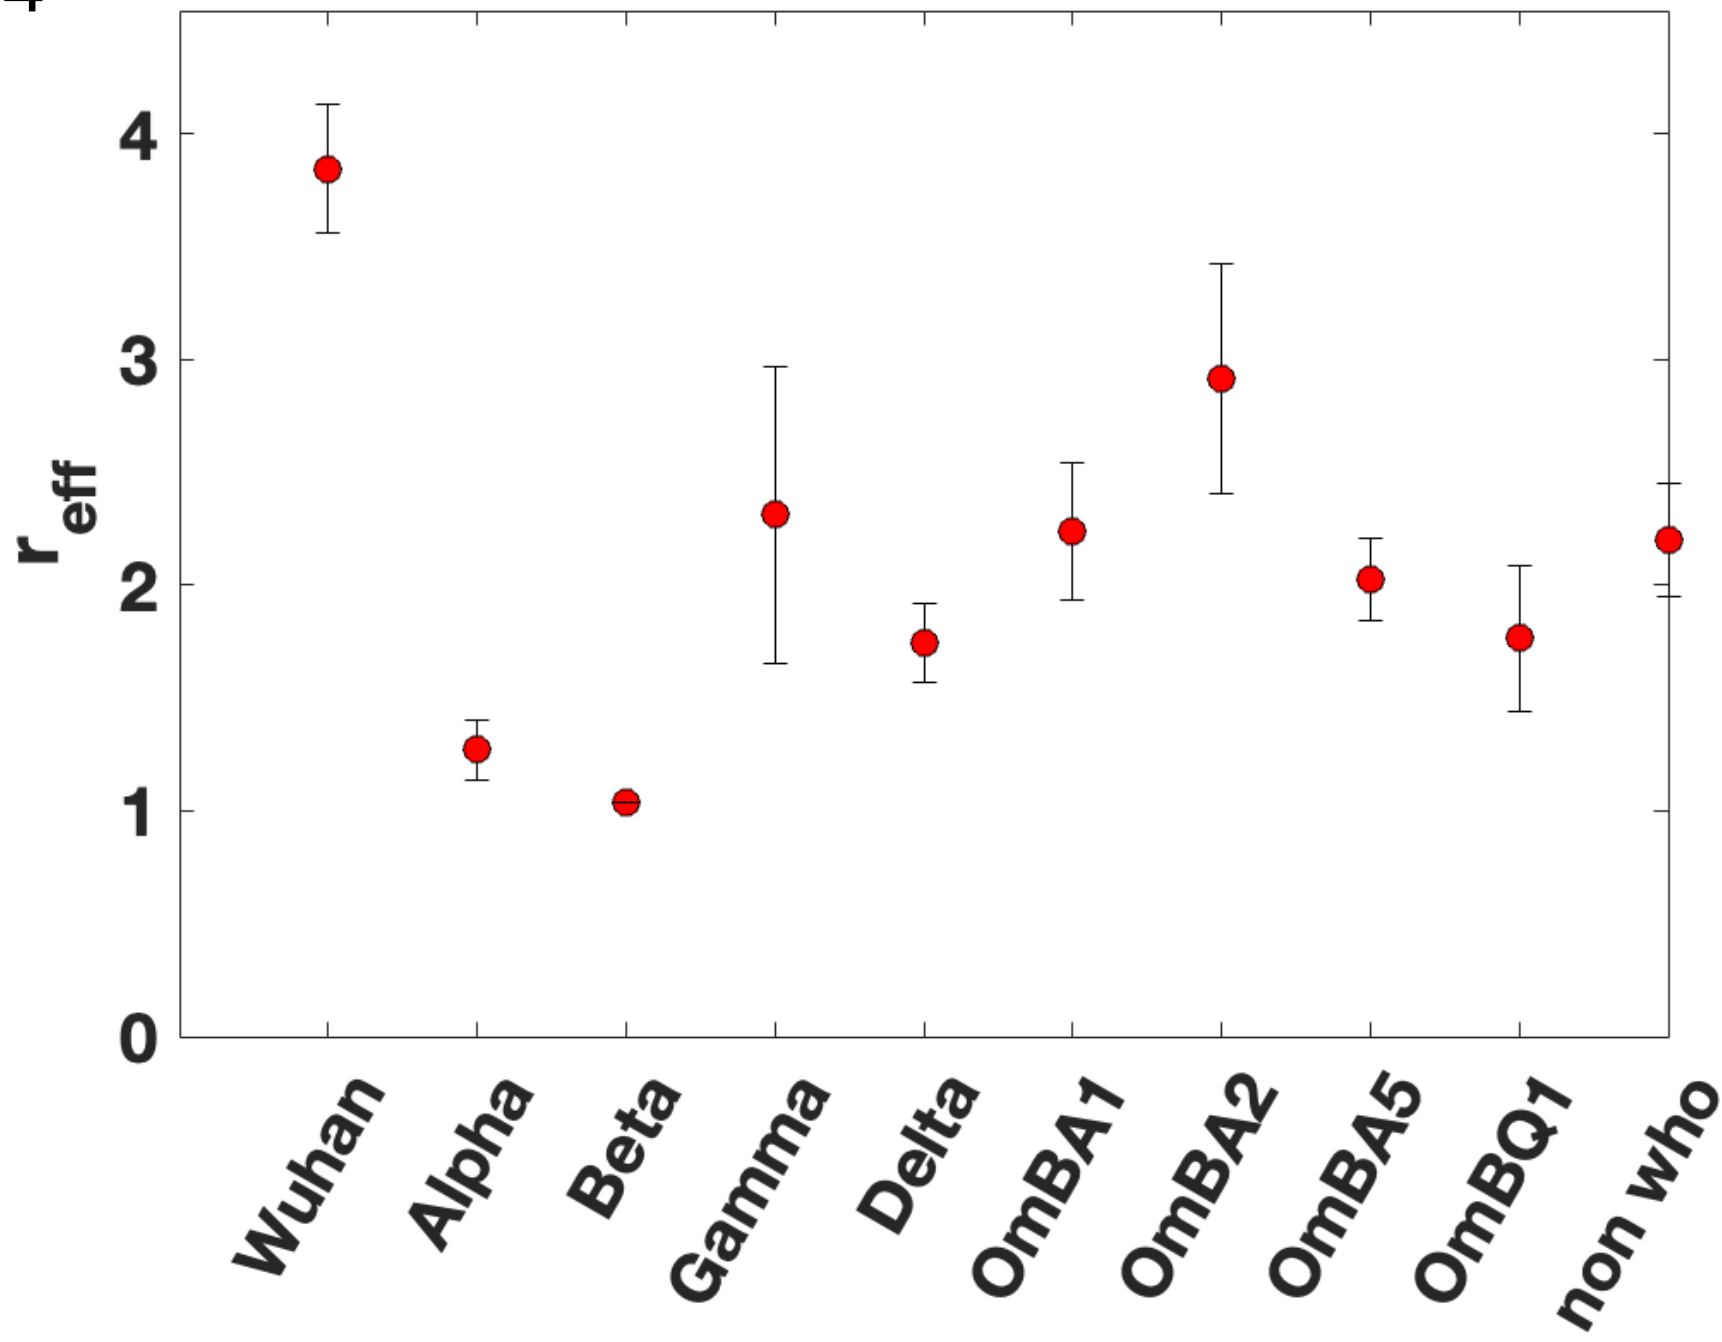



FIGURE 5

# More than 70 % variant in peaks

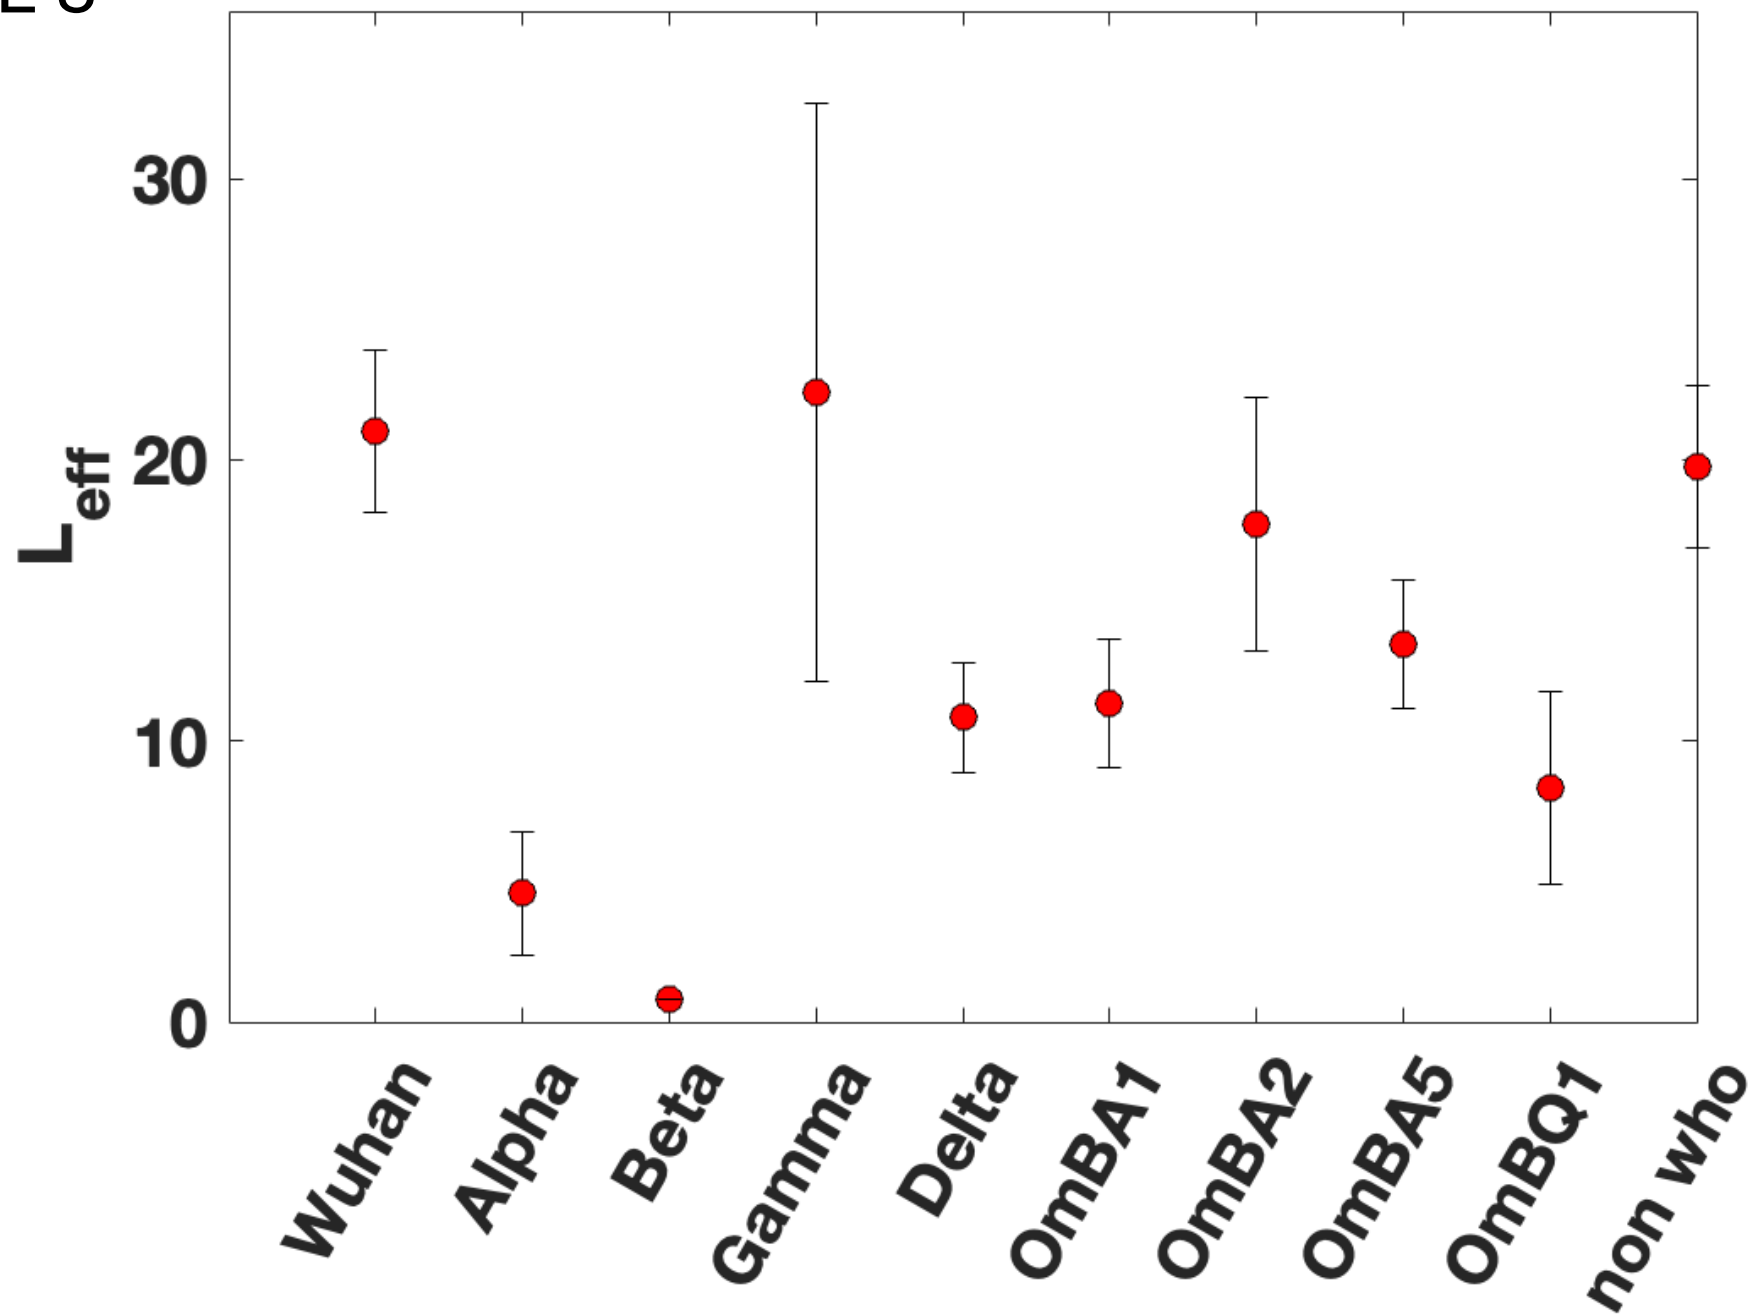

Source: http://medrxiv.org/content/10.1101/2024.04.09.24305557v1.full.pdf
